# Supplementary material
Source: PubMed Central journal article supplement (PMC3489636)
Supplement: psb-7-1095-s01.pdf [file psb-7-1095-s01.pdf]

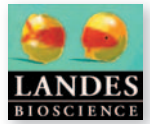

## **Supplemental Material to:**

**Mohammad Amin Omidbakhshfard, Nooshin Omranian,  
Farajollah Shahriari Ahmadi<sup>3</sup>, Zoran Nikoloski and Bernd  
Mueller-Roeber**

**Effect of salt stress on genes encoding translation-  
associated proteins in *Arabidopsis thaliana***

**Plant Signaling & Behavior 2012; 7(9)**

**<http://dx.doi.org/10.4161/psb.21218>**

**<http://www.landesbioscience.com/journals/psb/article/21218/>**

## Supplementary file 1 – Effect of salt stress on genes encoding translation-associated proteins in *Arabidopsis thaliana*

This file includes all tables from the inferential and descriptive analysis of the data set.

i. Differential expression based on linear models

**Table S1. Status of all genes differentially expressed in salt-treated versus non-treated samples at the time points given.** '0' indicates no regulation, '1' indicates up-regulation, and '-1', down-regulation. The columns (left to right) indicate the AGI code of the gene and the time points.

| AGI       | 2 h | 4 h | 6 h | 8 h | 24 h |
|-----------|-----|-----|-----|-----|------|
| AT1G22110 | -1  | -1  | 0   | -1  | 0    |
| AT3G08010 | 1   | 1   | 1   | 0   | 0    |
| AT1G32990 | 0   | 1   | 0   | 0   | 0    |
| AT1G33140 | 0   | 1   | 1   | 0   | 0    |
| AT1G48830 | 0   | 1   | 0   | 0   | 0    |
| AT1G74970 | 0   | 1   | 0   | 0   | 0    |
| AT1G75350 | 0   | 1   | 0   | 0   | 0    |
| AT2G24090 | 0   | 1   | 0   | 0   | 0    |
| AT3G02660 | 0   | 1   | 1   | 0   | 0    |
| AT3G08740 | 0   | 1   | 0   | 0   | 0    |
| AT3G13120 | 0   | 1   | 0   | 0   | 0    |
| AT3G13580 | 0   | 1   | 1   | 0   | 0    |
| AT3G20230 | 0   | 1   | 1   | 0   | 0    |
| AT3G25660 | 0   | 1   | 0   | 0   | 0    |
| AT3G25920 | 0   | 1   | 0   | 0   | 0    |
| AT3G44890 | 0   | 1   | 0   | 0   | 0    |
| AT4G11175 | 0   | 1   | 1   | 1   | 0    |
| AT4G17560 | 0   | 1   | 0   | 0   | 0    |
| AT4G20360 | 0   | 1   | 0   | 0   | 0    |
| AT4G34620 | 0   | 1   | 0   | 0   | 0    |
| AT5G08650 | 0   | 1   | 0   | 0   | 0    |
| AT5G14320 | 0   | 1   | 0   | 0   | 0    |
| AT5G14660 | 0   | 1   | 1   | 0   | 0    |
| AT5G16710 | 0   | 1   | 1   | 0   | 0    |
| AT5G36170 | 0   | 1   | 0   | 0   | 0    |
| AT5G40950 | 0   | 1   | 0   | 0   | 0    |
| AT1G80620 | 0   | 0   | 1   | 0   | 0    |
| AT3G01170 | 0   | 0   | 1   | 0   | 0    |
| AT3G09200 | 0   | 0   | 1   | 0   | 0    |

| AGI       | 2 h | 4 h | 6 h | 8 h | 24 h |
|-----------|-----|-----|-----|-----|------|
| AT4G36420 | 0   | 0   | 1   | 0   | 0    |

ii. Differentially expressed genes over all time points (global regulators)

**Table S2. Expression level and the relative significance levels of the four global regulators.** The columns (left to right) include the AGI code of the gene and for each time point the relative log-fold changes (lfc) with the *p*-value.

| Time points | 2 h   |                 | 4 h   |                 | 6 h   |                 | 8 h   |                 | 24 h  |                 |
|-------------|-------|-----------------|-------|-----------------|-------|-----------------|-------|-----------------|-------|-----------------|
| AGI code    | lfc   | <i>p</i> -value |
| AT1G22110   | -4.27 | 3.952E-08       | -2.43 | 1.13E-04        | -0.92 | 0.0883          | -1.79 | 0.0023          | -0.69 | 0.195           |
| AT4G11175   | 0.32  | 1.42E-01        | 1.20  | 1.20E-05        | 0.77  | 0.0015          | 0.73  | 0.0025          | 0.013 | 0.950           |
| AT3G08010   | 0.90  | 6.42E-03        | 1.72  | 8.44E-06        | 0.92  | 0.0055          | 0.71  | 0.0265          | 0.045 | 0.880           |
| AT3G20230   | 0.54  | 4.26E-02        | 1.11  | 2.13E-04        | 0.81  | 0.0037          | 0.65  | 0.0163          | 0.53  | 0.0484          |

**Table S3. Gene names and the relative expression patterns over all time points.** '0' indicates no regulation, '1' indicates up-regulation, and '-1' indicates down-regulation. The columns (left to right) include the AGI code of the gene and the time points.

| AGI code  | Gene name                                                 | 2 h | 4 h | 6 h | 8 h | 24 h |
|-----------|-----------------------------------------------------------|-----|-----|-----|-----|------|
| AT1G22110 | structural constituent of ribosome                        | -1  | -1  | 0   | -1  | 0    |
| AT4G11175 | translation initiation factor IF-1, chloroplast, putative | 0   | 1   | 1   | 1   | 0    |
| AT3G08010 | ATAB2; RNA binding                                        | 1   | 1   | 1   | 1   | 0    |
| AT3G20230 | 50S ribosomal protein L18 family                          | 1   | 1   | 1   | 1   | 1    |

iii. Differentially expressed genes between consecutive time points across conditions

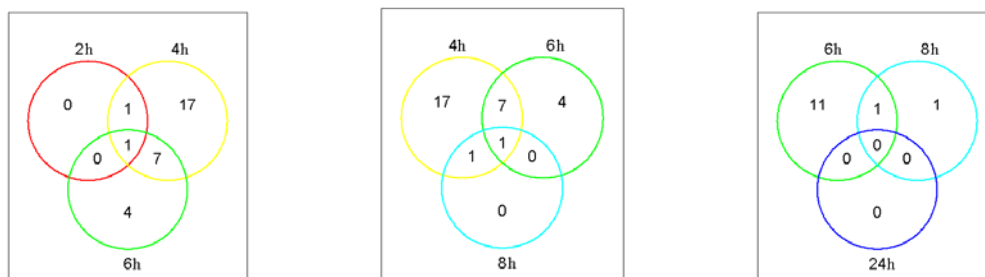

**Figure S1. Venn diagrams of the listed differentially expressed genes.** Shown are the numbers of genes in the intersection of each three consecutive time points. Each time point is specified by a circle given in a particular color.

## Cluster-based approach to identify global effectors

**Table S4.Global effectors.** Global effectors are the genes which contribute to the difference between control and treatment clusterings, as calculated by Eq. (9) in the main text.

| AGI code  | Gene name                                                                                              |
|-----------|--------------------------------------------------------------------------------------------------------|
| AT3G01170 | structural constituent of ribosome                                                                     |
| AT5G15260 | structural constituent of ribosome                                                                     |
| AT1G16720 | HCF173 (high chlorophyll fluorescence phenotype 173); binding / catalytic/ transcription repressor     |
| AT1G15390 | PDF1A (PEPTIDE DEFORMYLASE 1A); peptide deformylase                                                    |
| AT4G11175 | translation initiation factor IF-1, chloroplast, putative                                              |
| AT1G32990 | PRPL11 (PLASTID RIBOSOMAL PROTEIN L11); structural constituent of ribosome                             |
| AT1G17220 | FUG1 (fu-gaeri1); translation initiation factor                                                        |
| AT5G26830 | threonyl-tRNAsynthetase / threonine--tRNA ligase (THRRS)                                               |
| AT1G26910 | 60S ribosomal protein L10 (RPL10B)                                                                     |
| AT3G58140 | phenylalanyl-tRNAsynthetase class IIc family protein                                                   |
| AT4G37660 | ribosomal protein L12 family protein                                                                   |
| AT3G25660 | glutamyl-tRNA(Gln) amidotransferase, putative                                                          |
| AT4G27130 | eukaryotic translation initiation factor SUI1, putative                                                |
| AT2G20060 | ribosomal protein L4 family protein                                                                    |
| AT3G63490 | ribosomal protein L1 family protein                                                                    |
| AT3G04230 | 40S ribosomal protein S16 (RPS16B)                                                                     |
| AT5G40950 | RPL27 (RIBOSOMAL PROTEIN LARGE SUBUNIT 27); structural constituent of ribosome                         |
| AT3G13120 | 30S ribosomal protein S10, chloroplast, putative                                                       |
| AT3G08010 | ATAB2; RNA binding                                                                                     |
| AT3G04770 | RPSAb (40S ribosomal protein SA B); structural constituent of ribosome                                 |
| AT5G16710 | DHAR3 (dehydroascorbate reductase 1); glutathione dehydrogenase (ascorbate)                            |
| AT3G15190 | chloroplast 30S ribosomal protein S20, putative                                                        |
| AT4G30690 | translation initiation factor 3 (IF-3) family protein                                                  |
| AT2G09990 | 40S ribosomal protein S16 (RPS16A)                                                                     |
| AT3G01800 | ribosome recycling factor family protein / ribosome releasing factor family protein                    |
| AT5G14320 | 30S ribosomal protein S13, chloroplast (CS13)                                                          |
| AT2G47610 | 60S ribosomal protein L7A (RPL7aA)                                                                     |
| AT4G17560 | ribosomal protein L19 family protein                                                                   |
| AT2G27710 | 60S acidic ribosomal protein P2 (RPP2B)                                                                |
| AT3G62910 | APG3 (ALBINO AND PALE GREEN); translation release factor/ translation release factor, codon specific   |
| AT5G52520 | OVA6 (OVULE ABORTION 6); ATP binding / aminoacyl-tRNA ligase/ nucleotide binding / proline-tRNA ligase |
| AT2G19740 | 60S ribosomal protein L31 (RPL31A)                                                                     |

| AGI code  | Gene name                                                                                                                                    |
|-----------|----------------------------------------------------------------------------------------------------------------------------------------------|
| AT1G33120 | 60S ribosomal protein L9 (RPL90B)                                                                                                            |
| AT5G08650 | GTP-binding protein LepA, putative                                                                                                           |
| AT3G11250 | 60S acidic ribosomal protein P0 (RPP0C)                                                                                                      |
| AT1G29070 | ribosomal protein L34 family protein                                                                                                         |
| AT4G36420 | ribosomal protein L12 family protein                                                                                                         |
| AT5G14660 | PDF1B (PEPTIDE DEFORMYLASE 1B); iron ion binding / peptide deformylase                                                                       |
| AT3G02660 | emb2768 (EMBRYO DEFECTIVE 2768); ATP binding / RNA binding / aminoacyl-tRNA ligase/ nucleotide binding / tyrosine-tRNA ligase                |
| AT4G29060 | emb2726 (embryo defective 2726); RNA binding / translation elongation factor                                                                 |
| AT3G13490 | OVA5 (OVULE ABORTION 5); ATP binding / aminoacyl-tRNA ligase/ lysine-tRNA ligase/ nucleic acid binding / nucleotide binding                  |
| AT1G48520 | GATB (GLU-ADT SUBUNIT B); carbon-nitrogen ligase, with glutamine as amido-N-donor / glutaminyl-tRNA synthase (glutamine-hydrolyzing)/ ligase |
| AT1G07320 | RPL4; poly(U) binding / structural constituent of ribosome                                                                                   |
| AT5G47190 | ribosomal protein L19 family protein                                                                                                         |
| AT1G62750 | SCO1 (SNOWY COTYLEDON 1); ATP binding / translation elongation factor/ translation factor, nucleic acid binding                              |
| AT1G09620 | ATP binding / aminoacyl-tRNA ligase/ leucine-tRNA ligase/ nucleotide binding                                                                 |
| AT1G74970 | RPS9 (RIBOSOMAL PROTEIN S9); structural constituent of ribosome                                                                              |
| AT5G13510 | ribosomal protein L10 family protein                                                                                                         |
| AT1G14320 | SAC52 (SUPPRESSOR OF ACAULIS 52); structural constituent of ribosome                                                                         |
| AT4G31700 | RPS6 (RIBOSOMAL PROTEIN S6); structural constituent of ribosome                                                                              |
| AT5G20290 | 40S ribosomal protein S8 (RPS8A)                                                                                                             |
| AT3G20230 | 50S ribosomal protein L18 family                                                                                                             |
| AT1G33330 | peptide chain release factor, putative                                                                                                       |
| AT1G80620 | ribosomal protein S15 family protein                                                                                                         |
| AT2G39140 | SVR1 (SUPPRESSOR OF VARIATION 1); RNA binding / pseudouridine synthase                                                                       |
| AT3G02760 | ATP binding / aminoacyl-tRNA ligase/ histidine-tRNA ligase/ nucleotide binding                                                               |
| AT1G05190 | emb2394 (embryo defective 2394); structural constituent of ribosome                                                                          |
| AT5G24490 | 30S ribosomal protein, putative                                                                                                              |
| AT5G15200 | 40S ribosomal protein S9 (RPS9B)                                                                                                             |
| AT5G30510 | RPS1 (RIBOSOMAL PROTEIN S1); RNA binding / structural constituent of ribosome                                                                |
| AT1G68590 | plastid-specific 30S ribosomal protein 3, putative / PSRP-3, putative                                                                        |

**Supplementary file 2 – Effect of salt stress on genes encoding translation-associated proteins in *Arabidopsis thaliana*.**

**Gene names, annotation and qRT-PCR primer pairs used in this study**

| Transcript_identifier | Annotation - for multiple identifier mappings only the annotation      | primer_fw_sequence       | primer_fw_start | primer_fw_length |
|-----------------------|------------------------------------------------------------------------|--------------------------|-----------------|------------------|
| AT1G05190             | emb2394__Ribosomal protein L6 family                                   | ACCCACGCGAAGTTGAGCTTAC   | 327             | 22               |
| AT1G07070             | Ribosomal protein L35Ae family protein                                 | GAACGTGTCAGACTCTATGTCAGG | 109             | 24               |
| AT1G07320             | RPL4__ribosomal protein L4                                             | AATGCGAGGTACGGTGTTGATG   | 828             | 22               |
| AT1G07920             | GTP binding Elongation factor Tu family protein                        | TCTGCCGCAGGTGAATCAAAGG   | 1481            | 22               |
| AT1G09590             | Translation protein SH3-like family protein                            | ACATTTGCAACCACCAAAGCG    | 17              | 22               |
| AT1G09620             | ATP binding;leucine-tRNA ligases;aminoacyl-tRNA ligases;nucleotide bin | TGACGCAGAATCCTCCATCTCCAG | 3344            | 24               |
| AT1G13950             | ATELF5A-1_EIF-5A_EIF5A_ELF5A-1__eukaryotic elongation factor 5A-1      | CTCAACAAGCTGGAACCATCCG   | 113             | 22               |
| AT1G14320             | RPL10_RPL10A_SAC52__Ribosomal protein L16p/L10e family protein         | CCAAGTTGAGGCAAGAGAAGCG   | 600             | 22               |
| AT1G14610             | TWN2_VALRS__valyl-tRNA synthetase / valine--tRNA ligase (VALRS)        | GCTGGTATAGCTACACAGGTGGTG | 695             | 24               |
| AT1G15250             | Zinc-binding ribosomal protein family protein                          | TTCTCGGAGCCGCAAAGATTTTC  | 33              | 22               |
| AT1G15390             | ATDEF1_PDF1A__peptide deformylase 1A                                   | CGCTGCTCCTCAAATTGGTGTTTC | 404             | 23               |
| AT1G16720             | HCF173__high chlorophyll fluorescence phenotype 173                    | TTTCGACCGGTCAACCCAGAAG   | 1294            | 22               |
| AT1G17220             | FUG1__Translation initiation factor 2, small GTP-binding protein       | GTGCGAAACGCAATGGAAGGAC   | 2997            | 22               |
| AT1G18440             | Peptidyl-tRNA hydrolase family protein                                 | AAGGCCTTGTTTTGGGAAAGGC   | 425             | 21               |
| AT1G18540             | Ribosomal protein L6 family protein                                    | TTCCCTCGTCACGATGCTCAG    | 163             | 22               |
| AT1G22110             | structural constituent of ribosome                                     | TCCGATACCGTTGCTTGCTCAG   | 400             | 22               |
| AT1G23410             | Ribosomal protein S27a / Ubiquitin family protein                      | CGCACAAGAAAGTGAAGCTAGCAG | 296             | 24               |
| AT1G26880             | Ribosomal protein L34e superfamily protein                             | ACTGGCAAGCGTATTCAAGGAATC | 186             | 24               |
| AT1G26910             | RPL10B__Ribosomal protein L16p/L10e family protein                     | AATCAACGCGATGGGACGAAGACC | 49              | 24               |
| AT1G27400             | Ribosomal protein L22p/L17e family protein                             | TGCTGAGAGCAATGCTGAGGTC   | 388             | 22               |
| AT1G29070             | Ribosomal protein L34                                                  | TTTCTCTCGTCGCCTGTTTCCC   | 267             | 22               |
| AT1G32990             | PRPL11__plastid ribosomal protein l11                                  | CTACGCACAATTGCAGCAGAGAAG | 561             | 24               |
| AT1G33120             | Ribosomal protein L6 family                                            | TTCTTGGCGAGAAGAAGGTGAGG  | 442             | 24               |
| AT1G33140             | PGY2__Ribosomal protein L6 family                                      | CTTCTTGGCGAGAAGAAGGTG    | 441             | 22               |
| AT1G33330             | Class I peptide chain release factor                                   | ATAGCATGAGAGCAGCCAAGGG   | 750             | 22               |
| AT1G35680             | Ribosomal protein L21                                                  | TGCCACTGTACATGCTGTTGTG   | 508             | 22               |

|           |                                                                        |                           |      |    |
|-----------|------------------------------------------------------------------------|---------------------------|------|----|
| AT1G48350 | Ribosomal L18p/L5e family protein                                      | ACACCTCTGGACCAACCATTGAG   | 408  | 23 |
| AT1G48520 | GATB__GLU-ADT subunit B                                                | GCGAATGACGTCAGTGTTCAG     | 1258 | 22 |
| AT1G48830 | Ribosomal protein S7e family protein                                   | TTGGCGGATTAGCCTCAGAGTG    | 42   | 22 |
| AT1G56070 | LOS1__Ribosomal protein S5/Elongation factor G/III/V family protein    | CGACCACGGGAAATCCACTCTTAC  | 194  | 24 |
| AT1G58380 | XW6__Ribosomal protein S5 family protein                               | CTCCGAGAGGTTCTGGTATTGTTG  | 654  | 24 |
| AT1G61580 | ARP2_RPL3B__R-protein L3 B                                             | AGCCATGACCGAGTATGACAGAAC  | 930  | 24 |
| AT1G62750 | ATSCO1_ATSCO1/CPEF-G_SCO1__Translation elongation factor EFG/EF2       | AAGGTGGAGGCTAACGTTGGTG    | 1794 | 22 |
| AT1G64510 | Translation elongation factor EF1B/ribosomal protein S6 family protein | CATGTCTGAAGATGAACGGCTTGG  | 385  | 24 |
| AT1G64600 | methyltransferases;copper ion binding                                  | TCGTCTCAGCGTTCCTACAAGC    | 997  | 22 |
| AT1G64880 | Ribosomal protein S5 family protein                                    | AGAGCTGGCTGAAGACAGAAATGC  | 1078 | 24 |
| AT1G68590 | Ribosomal protein PSRP-3/Ycf65                                         | CAGAGACACTCACCGCTGAAAC    | 217  | 22 |
| AT1G69410 | ATELF5A-3__ELF5A-3__eukaryotic elongation factor 5A-3                  | ACGACGAGCATCACTTCGAATCC   | 106  | 23 |
| AT1G70190 | Ribosomal protein L7/L12, oligomerisation;Ribosomal protein L7/L12, C- | AGCTCCCAACAGATTACGATCCAG  | 215  | 24 |
| AT1G72370 | AP40_P40_RP40_RPSAA__40s ribosomal protein SA                          | GACAGAAGTGGGATGTCATGGTTG  | 675  | 24 |
| AT1G74970 | RPS9_TWN3__ribosomal protein S9                                        | ATCAACTATCGTGATGCCAAGGAG  | 418  | 24 |
| AT1G75350 | emb2184__Ribosomal protein L31                                         | CGGTTTCTCTCCCGAACTCGTTTC  | 96   | 24 |
| AT1G77750 | Ribosomal protein S13/S18 family                                       | TGCGACGACCTTGTTGACATC     | 54   | 22 |
| AT1G78630 | emb1473__Ribosomal protein L13 family protein                          | ATCGTTGAGCATGCTGTTCTGTG   | 608  | 22 |
| AT1G79850 | CS17_PRPS17_RPS17__ribosomal protein S17                               | TCAAGCTTTCGTCTCCGTTCCGC   | 67   | 22 |
| AT1G80620 | S15/NS1, RNA-binding protein                                           | TCGAGCTTGCAAAGGTCAGAGAAG  | 1021 | 24 |
| AT2G01250 | Ribosomal protein L30/L7 family protein                                | TCCAAGGAATATGCCGAGAAGGAG  | 259  | 24 |
| AT2G09990 | Ribosomal protein S5 domain 2-like superfamily protein                 | TCCGACTCTCTGCGTTAGGTTTC   | 45   | 23 |
| AT2G16360 | Ribosomal protein S25 family protein                                   | AGGTGAACAACATGGTTCTGTTTCG | 154  | 24 |
| AT2G17360 | Ribosomal protein S4 (RPS4A) family protein                            | ACTCATTGCTGCAAACATGGC     | 101  | 22 |
| AT2G18020 | EMB2296__Ribosomal protein L2 family                                   | TCCTGAAGGAGCTGTTGTCTGC    | 369  | 22 |
| AT2G19730 | Ribosomal L28e protein family                                          | TCAAAGGCTGTTGCTAACCAGGTG  | 355  | 24 |
| AT2G19740 | Ribosomal protein L31e family protein                                  | TCGAAGACCAGGAGATCGAAG     | 38   | 22 |
| AT2G20060 | Ribosomal protein L4/L1 family                                         | TACTACTGTTGGTCCGCAGTTC    | 605  | 22 |
| AT2G24060 | Translation initiation factor 3 protein                                | GGAGCTTGCAACTGAAGAGAGC    | 754  | 22 |
| AT2G24090 | Ribosomal protein L35                                                  | ACAAGATGAAGACCCACAAGGC    | 297  | 22 |
| AT2G25840 | OVA4__Nucleotidyl transferase superfamily protein                      | AGCCTCTCCTTGCCAGATGCTTTG  | 1112 | 23 |
| AT2G27710 | 60S acidic ribosomal protein family                                    | ACTTCTTCATCGCCGTCTGCAC    | 1    | 22 |
| AT2G31060 | elongation factor family protein                                       | ATTCGCTCTGCTGGGAAAGACG    | 1836 | 22 |

|           |                                                                       |                           |      |    |
|-----------|-----------------------------------------------------------------------|---------------------------|------|----|
| AT2G31170 | SYCO ARATH__CysteinyI-tRNA synthetase, class Ia family protein        | GATCTCATTACACCCGAAAGGG    | 1361 | 23 |
| AT2G31610 | Ribosomal protein S3 family protein                                   | TGTTCCGAGGGCCTGTTATG      | 423  | 20 |
| AT2G32220 | Ribosomal L27e protein family                                         | AGAAATCGCGCGTGAAATGCTTC   | 216  | 23 |
| AT2G33450 | Ribosomal L28 family                                                  | TTCAGCCAATCGTCGCACGTAG    | 222  | 22 |
| AT2G33800 | Ribosomal protein S5 family protein                                   | GGGAATGTTGGTGTGGTTGTGC    | 615  | 23 |
| AT2G36160 | Ribosomal protein S11 family protein                                  | TTGCTCAGCGATGCAAGGAAC     | 345  | 21 |
| AT2G36620 | RPL24A__ribosomal protein L24                                         | TACCGAAAGCAGCACAAAGAAGGAC | 249  | 24 |
| AT2G37270 | ATRPS5B_RPS5B__ribosomal protein 5B                                   | GAGCTTTGATGACGTTTCGGTTAC  | 174  | 24 |
| AT2G38140 | PSRP4__plastid-specific ribosomal protein 4                           | TGCGAGGCCAAGAAACAAGAGC    | 286  | 22 |
| AT2G39140 | SVR1__pseudouridine synthase family protein                           | GCTGGAGTGGCATCAAGAAGAACC  | 559  | 24 |
| AT2G40510 | Ribosomal protein S26e family protein                                 | TCGGCAACAAGAGCGTAAACCC    | 14   | 22 |
| AT2G42710 | Ribosomal protein L1p/L10e family                                     | TTGAGGCGCATGTGAGATTGGG    | 669  | 22 |
| AT2G42740 | RPL16A__ribosomal protein large subunit 16A                           | TTCGCAACCCAAATCCAAATGGC   | 46   | 24 |
| AT2G43030 | Ribosomal protein L3 family protein                                   | GCTTTGGGTTTCGATTGGTGTCTG  | 650  | 22 |
| AT2G44120 | Ribosomal protein L30/L7 family protein                               | CAGTAAACATGCTGCGCCGAGTTG  | 772  | 24 |
| AT2G47610 | Ribosomal protein L7Ae/L30e/S12e/Gadd45 family protein                | CAAATCTCGTCTTGAGCGGTTG    | 640  | 23 |
| AT3G01170 | Ribosomal protein L34e superfamily protein                            | AGGCCTCTCTGTGTTTGTGAGTG   | 377  | 23 |
| AT3G01800 | Ribosome recycling factor                                             | AGAGATTCTCGTCGAGGCTTTGC   | 320  | 23 |
| AT3G02560 | Ribosomal protein S7e family protein                                  | TCCACAAGGATAAGGGTGTTCAC   | 139  | 24 |
| AT3G02660 | emb2768__Tyrosyl-tRNA synthetase, class Ib, bacterial/mitochondrial   | AACCCGGCTATGTTCCCAACAC    | 1238 | 22 |
| AT3G02760 | Class II aaRS and biotin synthetases superfamily protein              | CTTGATTACTACACCGGCGTCATC  | 2151 | 24 |
| AT3G04230 | Ribosomal protein S5 domain 2-like superfamily protein                | AGAAGACGGCAACAGCAGTCAC    | 96   | 22 |
| AT3G04770 | RPSAb__40s ribosomal protein SA B                                     | GAGCCTAGGTTGTTGATTCTCACC  | 407  | 24 |
| AT3G04840 | Ribosomal protein S3Ae                                                | ACCTTGGAAGCTCATGGATGTTT   | 756  | 24 |
| AT3G04920 | Ribosomal protein S24e family protein                                 | GGAAGAGCCAATGTTTCAAAGGC   | 200  | 23 |
| AT3G05590 | RPL18__ribosomal protein L18                                          | TGGAGTTCATGACTGGCAAGGAAG  | 256  | 24 |
| AT3G06040 | Ribosomal protein L12/ ATP-dependent Clp protease adaptor protein Clp | TGGTCCTGCACTCAATGAACACC   | 396  | 23 |
| AT3G06180 | Ribosomal protein L34e superfamily protein                            | TCTAGATGTGGTTGCCCTGTTGC   | 629  | 23 |
| AT3G07110 | Ribosomal protein L13 family protein                                  | TCGTTCCCTGATGCTCTCAAGGTC  | 443  | 23 |
| AT3G08010 | ATAB2__RNA binding                                                    | TGGTCTCTCTGTTGCTACTTCACG  | 899  | 24 |
| AT3G08720 | ATPK19_ATPK2_ATS6K2_S6K2__serine/threonine protein kinase 2           | AAGGACAAGATCAAGCTCCACAG   | 1329 | 24 |
| AT3G08740 | elongation factor P (EF-P) family protein                             | TTCGCGGTGATACTGTGCAAGGTG  | 656  | 24 |
| AT3G09200 | Ribosomal protein L10 family protein                                  | TCCCAAACATCTTTCTTCCAGGTG  | 496  | 24 |



|           |                                                                      |                           |      |    |
|-----------|----------------------------------------------------------------------|---------------------------|------|----|
| AT3G09630 | Ribosomal protein L4/L1 family                                       | TTGAAGCTTGCTCCTGGTGGTC    | 799  | 22 |
| AT3G11250 | Ribosomal protein L10 family protein                                 | CCACTCCGAGAACTCTGGAAACAC  | 296  | 24 |
| AT3G11940 | AML1_ATRPS5A_RPS5A__ribosomal protein 5A                             | TGACGACGTTACGGTCACAGAC    | 193  | 22 |
| AT3G12370 | Ribosomal protein L10 family protein                                 | AGCAGGGAAGACGAAGATCAACC   | 144  | 23 |
| AT3G13120 | Ribosomal protein S10p/S20e family protein                           | TCCCCGATACCCTAGATCCAACTCC | 277  | 24 |
| AT3G13490 | ATKRS-2_OVA5__Lysyl-tRNA synthetase, class II                        | ATCTCCTTTGGCCAAGCCACATC   | 1444 | 23 |
| AT3G13580 | Ribosomal protein L30/L7 family protein                              | TCCGTGATCGCCGAAATGACTG    | 116  | 22 |
| AT3G15190 | chloroplast 30S ribosomal protein S20, putative                      | TCGCCTTCTCAACCGGGAATTTG   | 250  | 23 |
| AT3G17040 | HCF107__high chlorophyll fluorescent 107                             | AAAGCTGGCCGGTATGAACAGG    | 1020 | 22 |
| AT3G17170 | RFC3__Translation elongation factor EF1B/ribosomal protein S6 family | TCCCGAGTTTGCTGATGCTGAAG   | 328  | 23 |
| AT3G18780 | ACT2_DER1_ENL2_LSR2__actin 2                                         | TCTCCGCTCTTTCTTCCAAGC     | 189  | 23 |
| AT3G20230 | Ribosomal L18p/L5e family protein                                    | CTGGGTTCTGCAGTTTCATGGC    | 157  | 22 |
| AT3G25520 | ATL5_OLI5_PGY3_RPL5A__ribosomal protein L5                           | TGCAGCTTACTGTACTGGCCTTC   | 350  | 23 |
| AT3G25660 | Amidase family protein                                               | ACTACAAGCGAGCTCAACAGGTG   | 1409 | 23 |
| AT3G25920 | RPL15__ribosomal protein L15                                         | TAGAGGAATCGCTGGAGGTATGC   | 508  | 23 |
| AT3G27160 | GHS1__Ribosomal protein S21 family protein                           | AAGGCGTCCTCAAGCAAGGTTTAC  | 483  | 24 |
| AT3G27830 | RPL12_RPL12-A__ribosomal protein L12-A                               | ATCACTCCCTTCCCGAACCAC     | 141  | 22 |
| AT3G27850 | RPL12-C__ribosomal protein L12-C                                     | CTTTCCAAACCCACCGCAATCG    | 144  | 22 |
| AT3G44890 | RPL9__ribosomal protein L9                                           | ACTCCTACTGCATCCCAAGGAAC   | 682  | 23 |
| AT3G49910 | Translation protein SH3-like family protein                          | TCGAGAGAATCACGAGGGAGAAGG  | 296  | 24 |
| AT3G54210 | Ribosomal protein L17 family protein                                 | TCGGACTTCCAGATTGGCAAAG    | 264  | 22 |
| AT3G55400 | OVA1__methionyl-tRNA synthetase / methionine--tRNA ligase / MetRS    | AGACACAGTGGAGAAGCTGGTTG   | 1432 | 23 |
| AT3G57490 | Ribosomal protein S5 family protein                                  | TCTTGAAACTTCGTCAAGGCAAC   | 711  | 24 |
| AT3G58140 | phenylalanyl-tRNA synthetase class IIc family protein                | ATAATGTTGCTTGGGCCTTCGG    | 1048 | 22 |
| AT3G58660 | Ribosomal protein L1p/L10e family                                    | AGCTGCCAAAGGGAAGTCGAAAC   | 1185 | 23 |
| AT3G60770 | Ribosomal protein S13/S15                                            | AGTGAGAGGACGATCACTTCGC    | 91   | 22 |
| AT3G62910 | APG3__Peptide chain release factor 1                                 | TCCTTCCGATCCTCTTGATGCC    | 511  | 22 |
| AT3G63190 | AtcpRRF_cpRRF_HFP108_RRF__ribosome recycling factor, chloroplast p   | GCGATGCTTGACAAGATTGAGGTG  | 505  | 24 |
| AT3G63490 | Ribosomal protein L1p/L10e family                                    | CCCGGATATGATGGTCAAGGTTGC  | 740  | 24 |
| AT4G01310 | Ribosomal L5P family protein                                         | AAAGTCTCGGCGTCTGGAACGTG   | 181  | 22 |
| AT4G04350 | EMB2369__tRNA synthetase class I (I, L, M and V) family protein      | TGGCCACCCGTTATAAGAAAGC    | 824  | 23 |
| AT4G11175 | Nucleic acid-binding, OB-fold-like protein                           | ATCCGGCCAATGATACGATGCC    | 192  | 22 |
| AT4G17560 | Ribosomal protein L19 family protein                                 | TGAGAGTTTGCTGCAGCTATGG    | 46   | 22 |

|           |                                                                       |                          |      |    |
|-----------|-----------------------------------------------------------------------|--------------------------|------|----|
| AT4G20360 | ATRAB8D_ATRABE1B_RABE1b__RAB GTPase homolog E1B                       | ATGGTTATGCCCCGGTGATCGAG  | 1377 | 22 |
| AT4G20980 | Eukaryotic translation initiation factor 3 subunit 7 (eIF-3)          | TGAGGAACCGTTGCCTGAAGATG  | 1718 | 23 |
| AT4G27090 | Ribosomal protein L14                                                 | GACGTTGTTGACCAGAACAGAGC  | 149  | 23 |
| AT4G27130 | Translation initiation factor SUI1 family protein                     | TGCAACGGAACTGTGGTTCAAG   | 454  | 22 |
| AT4G29060 | emb2726__elongation factor Ts family protein                          | AAGCCAGGACTTTGCTGCTGAG   | 2387 | 22 |
| AT4G30690 | Translation initiation factor 3 protein                               | GGTCAGCCACTGTTAGGCTTATTG | 330  | 24 |
| AT4G30800 | Nucleic acid-binding, OB-fold-like protein                            | TTC AACCATGGCAGAGCAGACG  | 75   | 22 |
| AT4G31700 | RPS6_RPS6A__ribosomal protein S6                                      | GATCGACGATGACCAGAACTACG  | 63   | 24 |
| AT4G32915 | FUNCTIONS IN: molecular_function unknown; INVOLVED IN: regulation of  | TCGTCGAGTCATCGACTGGTTTG  | 295  | 23 |
| AT4G33760 | tRNA synthetase class II (D, K and N) family protein                  | TTCACAGCTCCTAAGCCGGAAG   | 1611 | 22 |
| AT4G34620 | SSR16__small subunit ribosomal protein 16                             | GCGCAGGGACGGTAAACAAATC   | 159  | 22 |
| AT4G36420 | Ribosomal protein L12 family protein                                  | AAGCGTACGATGCAGTGTCSAAG  | 404  | 23 |
| AT4G37660 | Ribosomal protein L12/ ATP-dependent Clp protease adaptor protein Clp | ATCCTCCGCTACTCGTCACCTATG | 112  | 24 |
| AT5G02870 | Ribosomal protein L4/L1 family                                        | AGGAAAGTCGTACTAAGGAGGAG  | 1136 | 24 |
| AT5G05410 | DREB2_DREB2A__DRE-binding protein 2A                                  | TGTCTGGAGAATGGTGCGGAAG   | 734  | 22 |
| AT5G08650 | Small GTP-binding protein                                             | ACCATCGTACACAGGGATAAGGC  | 1778 | 23 |
| AT5G13510 | Ribosomal protein L10 family protein                                  | GCCATTGAAGGCACCAAATGGG   | 335  | 22 |
| AT5G13650 | elongation factor family protein                                      | TCGCGGGACAGCTATCCTTAAC   | 1685 | 22 |
| AT5G14320 | Ribosomal protein S13/S18 family                                      | TCGAACTAGGGCTCGTCAGATTC  | 355  | 23 |
| AT5G14660 | ATDEF2_DEF2_PDF1B__peptide deformylase 1B                             | TACGACCATCTGGAGGGAGTTC   | 717  | 22 |
| AT5G15200 | Ribosomal protein S4                                                  | ACGTTTGCTACTACCGCAACTATG | 81   | 24 |
| AT5G15260 |                                                                       | TCCAATCAGGGCTACTTCGATTTG | 412  | 24 |
| AT5G15760 | Ribosomal protein PSRP-3/Ycf65                                        | AATCTCCGCCACTTGGAAGAAG   | 294  | 23 |
| AT5G16140 | Peptidyl-tRNA hydrolase family protein                                | AGGAGGTCAAGGCTATCACAACG  | 536  | 23 |
| AT5G16710 | DHAR3__dehydroascorbate reductase 1                                   | AGTATCCTGAGCCTCCTTGC     | 409  | 22 |
| AT5G16715 | EMB2247__ATP binding;valine-tRNA ligases;aminoacyl-tRNA ligases;nuc   | TGGCGGAACCATCACAAATCAG   | 560  | 22 |
| AT5G18380 | Ribosomal protein S5 domain 2-like superfamily protein                | AGAGAGCTAAAGCAAGGAGCAAC  | 35   | 23 |
| AT5G20290 | Ribosomal protein S8e family protein                                  | ATGCTGCTCCGTTCAAGCAGTG   | 370  | 22 |
| AT5G23535 |                                                                       | GCTCCTCTCACGCCTCAAATG    | 385  | 22 |
| AT5G24490 | 30S ribosomal protein, putative                                       | ACTGACTCGAGCGTAGGAGAAG   | 725  | 22 |
| AT5G26830 | Threonyl-tRNA synthetase                                              | AGAAGCTGCTACAGGACAGGTG   | 2069 | 22 |
| AT5G30510 | ARRPS1_RPS1__ribosomal protein S1                                     | GAGAATTGCGCAAGCAGAAGCC   | 1157 | 22 |
| AT5G36170 | ATPRFB_HCF109__high chlorophyll fluorescent 109                       | GTGTTGCTGTTGTTGCACAGAG   | 1097 | 23 |

|           |                                                                       |                          |      |    |
|-----------|-----------------------------------------------------------------------|--------------------------|------|----|
| AT5G38290 | Peptidyl-tRNA hydrolase family protein                                | AAATGGTTGTCGCGGCTATCCC   | 617  | 22 |
| AT5G39850 | Ribosomal protein S4                                                  | CGACAAAGGCATATCAGGGTTGGG | 424  | 24 |
| AT5G40950 | RPL27__ribosomal protein large subunit 27                             | ATCGGCCATAAGAAAGGAGCTG   | 254  | 23 |
| AT5G41520 | RNA binding Plectin/S10 domain-containing protein                     | ACAGAGATGGATACCGTGGAGGTC | 479  | 24 |
| AT5G47190 | Ribosomal protein L19 family protein                                  | TGGTTTCGAGTTTGGGTTGTGC   | 17   | 22 |
| AT5G47880 | ERF1-1__eukaryotic release factor 1-1                                 | ACAGTGACTTGGCTTTGGACGTG  | 1162 | 23 |
| AT5G49030 | OVA2__tRNA synthetase class I (I, L, M and V) family protein          | CAGCCAAGAAAGCATCTGAAGGG  | 430  | 23 |
| AT5G51610 | Ribosomal protein L11 family protein                                  | TTGTTGCTTAAGGCTGCAGGTG   | 318  | 22 |
| AT5G52520 | OVA6_PRORS1__Class II aaRS and biotin synthetases superfamily protein | ACTTGAGGAGAACTTGTGGTTTCG | 528  | 24 |
| AT5G53070 | Ribosomal protein L9/RNase H1                                         | TCATCCGAGAGCAACGCAAGATG  | 406  | 23 |
| AT5G54600 | Translation protein SH3-like family protein                           | CCATGTCTTGTCTTGCAAAGCTC  | 200  | 24 |
| AT5G59240 | Ribosomal protein S8e family protein                                  | TGTGGAGGAAGAAGCGAAAGTATG | 121  | 24 |
| AT5G63300 |                                                                       | TGGTGCCTAAAGACGGCGAATC   | 264  | 22 |
| AT5G65220 | Ribosomal L29 family protein                                          | CTTCGTCTCCAGAAATCGGCAAG  | 345  | 23 |

| primer_fw_Tm | primer_fw_GC | primer_rev_sequence      | primer_rev_start | primer_rev_length | primer_rev_Tm | primer_rev_GC |
|--------------|--------------|--------------------------|------------------|-------------------|---------------|---------------|
| 63.704       | 54.545       | ACCATGTTATCGGTAAGCGTCCTG | 447              | 24                | 63.118        | 50            |
| 61.027       | 50           | ACCATGACACTTCCTCAGTGGTG  | 232              | 23                | 62.748        | 52.174        |
| 61.602       | 50           | TCTTAAGCTTCCTCTGACCCTTCC | 907              | 24                | 61.973        | 50            |
| 63.758       | 54.545       | ACACAGACACGCGACCAAATACC  | 1552             | 23                | 63.84         | 52.174        |
| 63.371       | 50           | TTCTCGCTCGAACTCCATGTCC   | 77               | 22                | 62.699        | 54.545        |
| 64.411       | 54.167       | CACTTGCTGGTGCACAAAGATGG  | 3403             | 24                | 62.922        | 50            |
| 62.117       | 54.545       | AGGTTGAAACCTCAACAACCTTGC | 193              | 24                | 62.545        | 45.833        |
| 62.361       | 54.545       | GTCCATGGCATGAGAGGAACTTAG | 668              | 24                | 61.342        | 50            |
| 63.125       | 54.167       | TGTACCGCCGTAAGTGGTCTTC   | 823              | 22                | 62.637        | 54.545        |
| 61.858       | 50           | TCCCTGTTCTTTACCCATTGCC   | 111              | 23                | 63.099        | 52.174        |
| 63.095       | 52.174       | ACCGGATTCACCATCACCATGAG  | 541              | 23                | 62.934        | 52.174        |
| 63.105       | 54.545       | AGTCCATCAACAGGCCTCTGTC   | 1394             | 22                | 62.364        | 54.545        |
| 63.458       | 54.545       | TGAGCCAATTGGGATTTGTTCTC  | 3056             | 24                | 61.961        | 45.833        |
| 62.015       | 52.381       | TTGTGGTTTAGCCAGCATAATCGG | 484              | 24                | 62.056        | 45.833        |
| 62.953       | 54.545       | AAACTTGGCAGGCTTCTCAACCG  | 223              | 23                | 64.324        | 52.174        |
| 63.267       | 54.545       | TGGTCACCACACGCTTGAGAAC   | 473              | 22                | 63.599        | 54.545        |
| 62.993       | 50           | CAACCTCTGAACCTTCCCACTTCC | 366              | 24                | 61.883        | 50            |
| 62.051       | 45.833       | TGCTCGTTTACAGTCCTCCTG    | 278              | 22                | 62.341        | 54.545        |
| 65.842       | 54.167       | TCTTAGGATCGGGAACACCACGAC | 149              | 24                | 64.326        | 54.167        |
| 63.239       | 54.545       | TGCTGCTTGGTTCACCTTGATG   | 466              | 22                | 62.011        | 50            |
| 63.155       | 54.545       | GATCAAACGCAATGGACAAACCAG | 327              | 24                | 61.727        | 45.833        |
| 63.052       | 50           | AGCGGATTCATGGTCGTGAC     | 620              | 22                | 64.095        | 54.545        |
| 64.78        | 54.167       | TTCTGGTTGATCAGAGCGCACGAC | 584              | 24                | 65.762        | 54.167        |
| 61.544       | 54.545       | CTGGTTGATCAAAGCGCATGAC   | 582              | 22                | 61.078        | 50            |
| 62.826       | 54.545       | GCCCGAACGTCATCTTCAAATGC  | 827              | 24                | 63.802        | 50            |
| 61.997       | 50           | TCCTAATCCTCGTATTCGGCTGTC | 632              | 24                | 62.175        | 50            |

|        |        |                           |      |    |        |        |
|--------|--------|---------------------------|------|----|--------|--------|
| 62.762 | 52.174 | ACGTCCATGGTAAGGGTAACCAC   | 529  | 23 | 62.56  | 52.174 |
| 63.181 | 54.545 | CAACTTCACTTCAGCACCCCTTACC | 1323 | 24 | 62.168 | 50     |
| 62.733 | 54.545 | TCAGAAAGTTCCACACCCTTCTCC  | 155  | 24 | 62.634 | 50     |
| 63.567 | 54.167 | ACCAGCAACCTCTTGGGCAATG    | 266  | 22 | 64.001 | 54.545 |
| 61.273 | 50     | GTAAGCAGTCAAACGTCGCCTTG   | 794  | 23 | 63.053 | 52.174 |
| 62.832 | 50     | AGTCACCACACGTTTCTTAGGC    | 1062 | 22 | 61.16  | 50     |
| 63.129 | 54.545 | CCTGCTTCCAATGGCTCAAACC    | 1942 | 22 | 62.657 | 54.545 |
| 62.56  | 50     | TCCTGCCACAAGCAACTCTTCG    | 445  | 22 | 63.672 | 54.545 |
| 62.933 | 54.545 | TACCGTCAAGAGGCCACAACCTC   | 1120 | 22 | 62.596 | 54.545 |
| 63.788 | 50     | CTTTCAACCCTGCCACCCTTTG    | 1206 | 22 | 62.538 | 54.545 |
| 61.779 | 54.545 | TGTTGTGGAGTGTTGTCGGAAG    | 277  | 22 | 61.352 | 50     |
| 63.451 | 52.174 | AAGTCGATACCTCAACCACCTTGC  | 237  | 24 | 63.256 | 50     |
| 62.612 | 50     | ATCCGTTGGTGGACTTCGATGC    | 279  | 22 | 63.542 | 54.545 |
| 61.994 | 50     | TGAGGGCCAGCTTCATCTTCATC   | 762  | 23 | 62.94  | 52.174 |
| 61.102 | 45.833 | TGCTTGAGCTTGACCTGAGAGAC   | 567  | 23 | 62.783 | 52.174 |
| 63.988 | 54.167 | GCCATCACCGCTTTCTTAATTGC   | 171  | 24 | 63.614 | 50     |
| 63.72  | 54.545 | CTTGGACTCGTAACCCATGAAACG  | 124  | 24 | 62.257 | 50     |
| 62.407 | 50     | TTGAACAGAGCTCTCCAAGCC     | 669  | 22 | 62.882 | 54.545 |
| 63.971 | 54.545 | TGTGGTTCGGGAAGGAATTGGG    | 144  | 22 | 63.162 | 54.545 |
| 63.465 | 50     | AGTTGCGCCACTTGAACACG      | 1099 | 20 | 62.392 | 55     |
| 62.384 | 50     | CAAGAGCTTAGCTTCAGGGTCAAC  | 357  | 24 | 61.985 | 50     |
| 62.571 | 52.174 | TGTGTCGCCATGGTTAGGGTTTC   | 124  | 23 | 63.596 | 52.174 |
| 62.107 | 45.833 | TAGCAAGCGACCCATTGATCCG    | 279  | 22 | 63.35  | 54.545 |
| 62.942 | 50     | AGGAGCATTGAGCCTCTTCAAATG  | 162  | 24 | 61.771 | 45.833 |
| 62.866 | 54.545 | TCCTAGTAGTGTCGCTGTCAGG    | 490  | 22 | 61.297 | 54.545 |
| 63.925 | 50     | GCAAGTGCAGCTTTCTTCAAGTCC  | 422  | 24 | 63.43  | 50     |
| 61.623 | 54.545 | TTCTTCTTGAAGGTGCAGCTATGG  | 158  | 24 | 61.466 | 45.833 |
| 62.623 | 54.545 | TGGCATGGCTTCTTGGTTTGGG    | 672  | 22 | 64.275 | 54.545 |
| 62.112 | 54.545 | TGTGGGTGGTTCTTGTGGTTTCC   | 856  | 23 | 63.699 | 52.174 |
| 61.176 | 50     | CACAATCTTCCCTCTACCCGTCAC  | 361  | 24 | 63.064 | 54.167 |
| 63.671 | 52.174 | TCCTGATAACGGGCCTGGATTG    | 1172 | 22 | 62.5   | 54.545 |
| 63.757 | 54.545 | GCGGCAACAACCTTCATCTTCG    | 88   | 22 | 63.215 | 54.545 |
| 63.53  | 54.545 | CCGAATCGTCTTGGTGTACCTC    | 1958 | 24 | 64.014 | 54.167 |

|        |        |                           |      |    |        |        |
|--------|--------|---------------------------|------|----|--------|--------|
| 61.595 | 52.174 | GCTCGAGAACCTCTGAGTAACTTG  | 1493 | 24 | 61.262 | 50     |
| 61.029 | 55     | GAGCTTTCCACTCACGATGACC    | 507  | 22 | 61.598 | 54.545 |
| 63.414 | 47.826 | AAGAGTGTAGCGCGTAGGCATC    | 286  | 22 | 63.063 | 54.545 |
| 63.784 | 54.545 | CCAGCTTCCCACCAAACCTCTTTG  | 363  | 24 | 63.975 | 54.167 |
| 63.502 | 52.174 | CACCCTCTGATCTGTGAGGGAAAG  | 750  | 24 | 62.796 | 54.167 |
| 62.158 | 52.381 | ACCAGGTGTCTTGGTCTTGTTCC   | 430  | 24 | 63.351 | 50     |
| 63.705 | 50     | CCTCCAAAGTAGCACCCGACAATCG | 354  | 24 | 64.073 | 54.167 |
| 61.014 | 45.833 | AAAGTTGCGTGCTTCGATGGC     | 251  | 21 | 62.996 | 52.381 |
| 64.24  | 54.545 | TATCTTTCTCGGTGGTGTGGAG    | 362  | 24 | 64.364 | 54.167 |
| 64.306 | 54.167 | TGATGGATCAACTCGAGTCTGTGG  | 663  | 24 | 62.538 | 50     |
| 63.969 | 54.545 | TCCTTCGCTTGAAAGTCATCTTGC  | 91   | 24 | 62.217 | 45.833 |
| 63.823 | 54.545 | GCCAAAGTACCACGAACTATCAGC  | 735  | 24 | 62.318 | 50     |
| 63.72  | 45.833 | TCACCAACGGAGATGTTGAGAACC  | 144  | 24 | 63.194 | 50     |
| 63.19  | 54.545 | CCTCCATTCTCCAGGCATCTTC    | 726  | 24 | 63.409 | 54.167 |
| 65.505 | 54.167 | ACGCTCTCAAGTTTGGGTATCCG   | 835  | 24 | 63.53  | 50     |
| 62.597 | 52.174 | AGTGGTCAAACACAAGCAAGAAGC  | 700  | 24 | 62.817 | 45.833 |
| 62.983 | 52.174 | TTGGGTCGACGGAATTGCAGAC    | 450  | 22 | 63.723 | 54.545 |
| 63.177 | 52.174 | TCCCTGTTCTGAATCGTCCTTTG   | 380  | 24 | 62.977 | 50     |
| 63.466 | 50     | TCTCCAAGTCAAACAAAGCCTGAG  | 210  | 24 | 61.585 | 45.833 |
| 63.467 | 54.545 | CAAACCCTCTTCGCCATGTACG    | 1317 | 22 | 62.163 | 54.545 |
| 61.899 | 50     | AGCACCAATTGATCCCACCTCTG   | 2219 | 23 | 63.143 | 52.174 |
| 63.654 | 54.545 | ATAAAGCTCGATCGGCGAACCG    | 175  | 22 | 63.664 | 54.545 |
| 61.518 | 50     | GCACCTTCCTTGATTGGCTGATG   | 468  | 23 | 62.647 | 52.174 |
| 64.057 | 50     | ATCAGCCGGCCTGTCTACCTAAC   | 832  | 24 | 64.658 | 54.167 |
| 61.218 | 47.826 | TCCTTGACCTCGTACATCCTTGC   | 264  | 23 | 62.602 | 52.174 |
| 63.222 | 50     | GCTTTCTCAATGCGAGCCCTTG    | 397  | 22 | 62.992 | 54.545 |
| 63.547 | 52.174 | TTTGCTCCAATGCCGTCCGATG    | 467  | 22 | 64.361 | 54.545 |
| 63.362 | 52.174 | TTATGACGCCGGCCTCGTTTAG    | 693  | 22 | 63.319 | 54.545 |
| 62.593 | 52.174 | AGAAAGGCGACCCAACAGACAG    | 513  | 22 | 63.119 | 54.545 |
| 62.697 | 50     | TCAAGCCCATTATCCAAGCTG     | 958  | 22 | 61.57  | 50     |
| 61.409 | 45.833 | TTTGCAGCAGCCCTTTCAGC      | 1398 | 20 | 62.444 | 55     |
| 66.009 | 54.167 | ACAGCAACTATTGCACCCGTTTCC  | 722  | 24 | 64.484 | 50     |
| 61.358 | 45.833 | CGACGGTACCCTTGTTAATCTTGG  | 556  | 24 | 61.798 | 50     |

|        |        |                          |      |    |        |        |
|--------|--------|--------------------------|------|----|--------|--------|
| 63.395 | 54.545 | TCTCAAAGGCAGACTTGGTCCAG  | 862  | 23 | 62.748 | 52.174 |
| 63.46  | 54.167 | CAAACCAACGTTTCCCTGAAGGAG | 365  | 24 | 62.636 | 50     |
| 62.841 | 54.545 | AGCATGTTTAGCTGCCTGAACTCC | 259  | 24 | 63.8   | 50     |
| 62.857 | 52.174 | TTGCTTACGCTGAGACCGTTG    | 222  | 22 | 64.185 | 54.545 |
| 62.963 | 54.167 | TGGATGAAGAGCTCGGAACCTC   | 347  | 22 | 62.153 | 54.545 |
| 63.703 | 52.174 | TTGCTCTTCCAACCGTGCCTCTG  | 1582 | 24 | 65.217 | 54.167 |
| 63.56  | 54.545 | TGGCAAGTGCCCATTCTTCCTC   | 212  | 22 | 63.48  | 54.545 |
| 63.887 | 52.174 | AGCAGCAGCCTCACACACAATC   | 320  | 22 | 64.002 | 54.545 |
| 63.521 | 54.545 | TTCCAAGTGCCCATGCCAAC     | 1118 | 22 | 64.501 | 54.545 |
| 63.636 | 52.174 | ACCACCTCATAGTGCCTCATCC   | 429  | 22 | 61.916 | 54.545 |
| 61.718 | 47.826 | ACCATTGTACACACGATTGGTTG  | 265  | 24 | 62.635 | 45.833 |
| 62.642 | 54.545 | ACAGAGCCGATTTGATGGAGAG   | 218  | 23 | 62.706 | 52.174 |
| 63.098 | 52.174 | AGTCTTCTCCAGTGGCCTCAAC   | 450  | 22 | 62.298 | 54.545 |
| 63.311 | 52.174 | TCGTTCTGTTCTAACGCTGCTTTG | 1478 | 24 | 62.42  | 45.833 |
| 61.986 | 52.174 | CACTTCATCTCCCTCTTGAAACCC | 607  | 24 | 61.467 | 50     |
| 63.961 | 50     | AGGTACATCTCCACCAGGCATCTC | 600  | 24 | 63.923 | 54.167 |
| 62.63  | 54.545 | ATGATGAACCACCACCGAAGCG   | 203  | 22 | 63.796 | 54.545 |
| 63.183 | 54.545 | TGCACGGTGGCTAGAAGAAGAG   | 206  | 22 | 62.652 | 54.545 |
| 62.323 | 52.174 | ATCCTCACCAAGAGGCTACTC    | 745  | 23 | 61.812 | 52.174 |
| 63.618 | 54.167 | TTTCGACGGCTGAATCCCAACG   | 360  | 22 | 64.012 | 54.545 |
| 61.233 | 50     | AGATACGACCACCACCGTCAAC   | 329  | 22 | 62.642 | 54.545 |
| 62.983 | 52.174 | TGGTGCTCGTTGATCCATGTAGG  | 1558 | 23 | 62.912 | 52.174 |
| 62.339 | 45.833 | TGACGCCAGGAGGTATAAGCAAG  | 853  | 23 | 62.665 | 52.174 |
| 61.891 | 50     | TTCCAAACTGGGACGTGAATCG   | 1164 | 22 | 61.48  | 50     |
| 64.079 | 52.174 | TTGACCGCAGCTTTCTGCATAGG  | 1244 | 23 | 63.937 | 52.174 |
| 62.436 | 54.545 | AGCAGATGCCGAGATACCCTTACC | 167  | 24 | 64.251 | 54.167 |
| 62.231 | 54.545 | GCCACCAGTTCCTGCTCTAACTC  | 571  | 24 | 63.774 | 54.167 |
| 63.067 | 50     | CCGGAGTACTGATTTGGGCTATGC | 583  | 24 | 63.712 | 54.167 |
| 63.967 | 54.167 | AGCCTGGGATTTGGCATGAGC    | 815  | 22 | 64.137 | 54.545 |
| 63.145 | 54.545 | CTTCTGTACCTTTGGAACCTGGTG | 330  | 24 | 61.643 | 50     |
| 63.431 | 52.174 | TCAGCGTACGCAGTAATCTTCAGC | 886  | 24 | 63.59  | 50     |
| 63.502 | 54.545 | TGCGGCTTAGCAGGTTTGCTTC   | 268  | 22 | 64.551 | 54.545 |
| 61.295 | 50     | TGGGTATCATATGCAATGCCTGAG | 112  | 24 | 61.172 | 45.833 |

|        |        |                          |      |    |        |        |
|--------|--------|--------------------------|------|----|--------|--------|
| 62.859 | 54.545 | ACAAGCCACCGGCACAATAAGC   | 1436 | 22 | 64.576 | 54.545 |
| 63.344 | 52.174 | ACTTGCTTCTGCTCCCTCTGTG   | 1787 | 22 | 62.872 | 54.545 |
| 62.474 | 52.174 | TGGCACACGGTTGATGTCAATG   | 262  | 22 | 62.314 | 50     |
| 62.184 | 50     | ATCGCCTTGAAGCTGAATAACCTG | 513  | 24 | 61.816 | 45.833 |
| 63.709 | 54.545 | ACCACTGTAGTTGGTGGGCTTG   | 2503 | 22 | 63.085 | 54.545 |
| 62.051 | 50     | CATCCGGCGAAAGAATCACCCAG  | 449  | 22 | 62.231 | 54.545 |
| 63.737 | 54.545 | TTACCAGGCCTCTTCCCTTACC   | 170  | 23 | 62.023 | 52.174 |
| 61.651 | 50     | GGGAAACCTTGCTTATCGCAACC  | 197  | 23 | 62.877 | 52.174 |
| 63.084 | 52.174 | TGCTCTAATAGCTGGCTCCACAC  | 367  | 23 | 62.67  | 52.174 |
| 62.667 | 54.545 | CTCAAATTCCTCCACCAATCTCG  | 1714 | 24 | 61.748 | 50     |
| 62.975 | 54.545 | ATCCGCATCTTCTTGCCTTGG    | 228  | 22 | 61.885 | 50     |
| 63.904 | 52.174 | CCCAATGCCGTAATCGTTCTCAC  | 467  | 23 | 62.424 | 52.174 |
| 63.733 | 54.167 | TCGCTCGAGTTTCTTCGTTGAG   | 178  | 23 | 63.348 | 52.174 |
| 61.713 | 50     | TGATACCAAGCCTTGCCTGCTG   | 1197 | 22 | 63.527 | 54.545 |
| 62.925 | 54.545 | TCGCTCAGCCAATGCTTATCCG   | 798  | 22 | 63.652 | 54.545 |
| 62.429 | 52.174 | GTGCTTCACTAGCAATCACCTTGG | 1913 | 24 | 62.513 | 50     |
| 63.248 | 54.545 | AAGCCAAGCGTTCATGCCTTTC   | 397  | 22 | 62.893 | 50     |
| 62.517 | 54.545 | TGTTCCATCTTCAAAGGCAACCAG | 1790 | 24 | 62.131 | 45.833 |
| 62.146 | 52.174 | TGCAAGAGCATTGAACCTCCTCAG | 502  | 24 | 63.506 | 50     |
| 61.31  | 54.545 | CTTTCAGGGCTTGGCAATCCAG   | 844  | 22 | 62.403 | 54.545 |
| 61.789 | 45.833 | TCCAGAGCTCACGCTTGTTACG   | 209  | 22 | 63.185 | 54.545 |
| 61.284 | 45.833 | TGGTCTACGAGGGAGATTGAGTTC | 510  | 24 | 61.771 | 50     |
| 61.48  | 47.826 | TTTGGTTTCTCTAGCGGCTTAC   | 354  | 23 | 61.714 | 47.826 |
| 62.607 | 52.174 | CCAGGTGGTTTACCAATGCCTATG | 637  | 24 | 62.07  | 50     |
| 61.647 | 54.545 | AAGATCTTCGATCCAATGAAGCC  | 469  | 24 | 61.282 | 45.833 |
| 61.814 | 50     | AAAGCTTCGACCACAGCTCGAC   | 667  | 22 | 63.692 | 54.545 |
| 61.227 | 47.826 | GCACAGATTCACTAGCTGGTTGAG | 95   | 24 | 62.035 | 50     |
| 64.291 | 54.545 | AACAGCTGCCTCTTACCTTCTC   | 485  | 24 | 65.029 | 54.167 |
| 62.172 | 54.545 | AACCTTACAAGGCCTCCCAGTG   | 447  | 22 | 62.582 | 54.545 |
| 61.607 | 54.545 | GTCTTGGTACGGACAATCTCCTTG | 792  | 24 | 61.508 | 50     |
| 62.352 | 54.545 | TCCTCAATGCTCTTACGGAGTG   | 2140 | 23 | 62.84  | 52.174 |
| 63.537 | 54.545 | AACTCAGCGTCAGTCCACTCTC   | 1233 | 22 | 62.323 | 54.545 |
| 63.474 | 52.174 | TCAGAGCTCTCGTCTTGTTGCG   | 1156 | 22 | 62.923 | 54.545 |



|        |        |                          |      |    |        |        |
|--------|--------|--------------------------|------|----|--------|--------|
| 63.876 | 54.545 | TGTTCCAGTCCCTCATCCATCTG  | 748  | 23 | 62.073 | 52.174 |
| 64.142 | 54.167 | ACGTGCTTCTGTGACTCTACTCTC | 503  | 24 | 62.219 | 50     |
| 62.999 | 52.174 | AGATCTTGACGCCGAGTCGTTG   | 330  | 22 | 63.234 | 54.545 |
| 63.655 | 54.167 | TGCTCCAGCCTTGTCACCATAC   | 540  | 22 | 62.941 | 54.545 |
| 62.449 | 50     | TCGGTATCATATGCAATGCCTGAG | 91   | 24 | 61.22  | 45.833 |
| 63.993 | 52.174 | ACGCCTGTA CTATTGGCAAGC   | 1232 | 22 | 64.052 | 54.545 |
| 62.342 | 52.174 | ACCAGTCTTTGGCAAATCAACCG  | 506  | 23 | 62.466 | 47.826 |
| 62.266 | 50     | TCAGCTCAGGCAGCTTTACTTCTG | 435  | 24 | 63.252 | 50     |
| 61.575 | 45.833 | GGTTTCGTCCGCATTTCCCATC   | 671  | 22 | 62.743 | 54.545 |
| 63.716 | 52.174 | TAGCATTCGCCAGACGCTTTGC   | 531  | 22 | 64.622 | 54.545 |
| 61.439 | 45.833 | ACCCTTGTCGCGTCCAGATATTAC | 331  | 24 | 62.883 | 50     |
| 61.219 | 45.833 | TTTACATTCCCACCACGCACAC   | 226  | 22 | 62     | 50     |
| 63.534 | 54.545 | AACACACCCGCTCTGAAACACG   | 339  | 22 | 64.143 | 54.545 |
| 62.117 | 52.174 | CCGAGCAACTTGTTTCTTCATACG | 419  | 24 | 61.016 | 45.833 |

| amplicon_length | either_primer_spans_exon | amplicon_3prime_distance | primer_pair_optimal_Ta |
|-----------------|--------------------------|--------------------------|------------------------|
| 121             | Yes                      | 608                      | 62.1258                |
| 124             | Yes                      | 466                      | 62.1868                |
| 80              | Yes                      | 418                      | 60.9593                |
| 72              | No                       | 302                      | 58.6311                |
| 61              | No                       | 691                      | 60.3589                |
| 60              | Yes                      | 376                      | 61.0404                |
| 81              | Yes                      | 618                      | 59.5844                |
| 69              | Yes                      | 372                      | 60.6682                |
| 129             | Yes                      | 2937                     | 62.9302                |
| 79              | Yes                      | 509                      | 60.7881                |
| 138             | Yes                      | 602                      | 60.6538                |
| 101             | Yes                      | 806                      | 61.2851                |
| 60              | Yes                      | 689                      | 58.3605                |
| 60              | Yes                      | 686                      | 56.9415                |
| 61              | No                       | 698                      | 61.3763                |
| 74              | No                       | 1656                     | 63.3602                |
| 71              | No                       | 312                      | 58.9633                |
| 93              | Yes                      | 482                      | 61.0563                |
| 101             | Yes                      | 828                      | 61.8735                |
| 79              | Yes                      | 453                      | 60.1075                |
| 61              | Yes                      | 505                      | 58.6559                |
| 60              | No                       | 295                      | 60.6011                |
| 143             | Yes                      | 529                      | 63.1217                |
| 142             | Yes                      | 510                      | 62.0837                |
| 78              | Yes                      | 331                      | 60.0882                |
| 125             | Yes                      | 368                      | 60.7865                |

|     |     |      |         |
|-----|-----|------|---------|
| 122 | Yes | 297  | 62.3484 |
| 66  | Yes | 762  | 58.7108 |
| 114 | Yes | 849  | 61.5759 |
| 73  | Yes | 2764 | 61.2419 |
| 141 | Yes | 455  | 61.4019 |
| 133 | Yes | 424  | 62.1637 |
| 149 | Yes | 872  | 62.8402 |
| 61  | Yes | 479  | 58.9056 |
| 124 | Yes | 737  | 64.2776 |
| 129 | Yes | 907  | 60.0085 |
| 61  | No  | 536  | 59.014  |
| 132 | Yes | 662  | 63.9587 |
| 65  | No  | 821  | 59.3886 |
| 88  | Yes | 516  | 61.5541 |
| 150 | Yes | 540  | 61.5374 |
| 76  | Yes | 576  | 60.9089 |
| 71  | Yes | 637  | 60.2884 |
| 62  | Yes | 411  | 60.1397 |
| 78  | No  | 643  | 62.3967 |
| 79  | Yes | 501  | 60.5849 |
| 99  | Yes | 822  | 61.647  |
| 80  | No  | 677  | 61.25   |
| 126 | Yes | 224  | 61.433  |
| 62  | Yes | 978  | 58.097  |
| 122 | Yes | 601  | 63.6163 |
| 68  | Yes | 367  | 61.0034 |
| 121 | Yes | 559  | 62.579  |
| 68  | Yes | 677  | 61.1832 |
| 103 | Yes | 426  | 59.9162 |
| 65  | Yes | 413  | 60.7238 |
| 61  | Yes | 403  | 59.8287 |
| 88  | Yes | 616  | 61.2681 |
| 123 | Yes | 510  | 62.3231 |

|     |     |      |         |
|-----|-----|------|---------|
| 133 | Yes | 564  | 61.1153 |
| 85  | Yes | 666  | 60.5898 |
| 71  | No  | 389  | 60.1258 |
| 142 | Yes | 404  | 61.885  |
| 136 | Yes | 528  | 61.158  |
| 86  | Yes | 409  | 62.16   |
| 106 | Yes | 528  | 63.1487 |
| 78  | Yes | 756  | 59.1767 |
| 77  | Yes | 289  | 62.8509 |
| 105 | Yes | 936  | 60.4401 |
| 78  | Yes | 726  | 60.6412 |
| 67  | Yes | 856  | 59.0845 |
| 99  | Yes | 704  | 61.7199 |
| 77  | No  | 381  | 61.0449 |
| 64  | Yes | 547  | 59.7769 |
| 61  | Yes | 502  | 58.9168 |
| 74  | No  | 892  | 60.1723 |
| 61  | Yes | 1040 | 58.0899 |
| 72  | Yes | 771  | 58.7765 |
| 80  | No  | 500  | 60.7688 |
| 69  | Yes | 730  | 59.1718 |
| 80  | No  | 574  | 62.6511 |
| 62  | Yes | 804  | 60.3358 |
| 77  | Yes | 318  | 61.3049 |
| 65  | Yes | 539  | 59.4118 |
| 142 | Yes | 601  | 62.8602 |
| 72  | No  | 468  | 60.1622 |
| 65  | No  | 331  | 60.9253 |
| 71  | Yes | 447  | 61.1976 |
| 60  | Yes | 380  | 59.1996 |
| 70  | Yes | 485  | 58.9213 |
| 67  | Yes | 302  | 61.0196 |
| 61  | Yes | 835  | 58.0746 |

|     |     |      |         |
|-----|-----|------|---------|
| 64  | No  | 761  | 60.439  |
| 70  | Yes | 947  | 60.1095 |
| 67  | Yes | 824  | 59.2415 |
| 79  | No  | 761  | 60.3611 |
| 71  | Yes | 750  | 61.0654 |
| 139 | Yes | 647  | 63.9213 |
| 97  | Yes | 946  | 62.295  |
| 71  | Yes | 637  | 61.1814 |
| 99  | Yes | 1123 | 62.6876 |
| 102 | Yes | 797  | 60.4977 |
| 77  | Yes | 1624 | 58.3668 |
| 62  | No  | 772  | 58.8215 |
| 101 | Yes | 905  | 61.5494 |
| 70  | Yes | 582  | 58.8146 |
| 100 | Yes | 616  | 59.6729 |
| 118 | Yes | 360  | 61.8869 |
| 63  | No  | 787  | 60.99   |
| 63  | No  | 731  | 60.0856 |
| 64  | Yes | 238  | 59.2614 |
| 65  | No  | 416  | 60.5733 |
| 66  | Yes | 554  | 57.9957 |
| 127 | Yes | 665  | 61.6004 |
| 143 | Yes | 339  | 61.5869 |
| 117 | Yes | 685  | 60.4979 |
| 60  | No  | 396  | 59.9098 |
| 77  | Yes | 824  | 61.9367 |
| 61  | Yes | 906  | 58.807  |
| 79  | Yes | 735  | 59.6977 |
| 76  | Yes | 702  | 63.2807 |
| 150 | Yes | 871  | 62.465  |
| 63  | Yes | 2257 | 60.3192 |
| 77  | No  | 545  | 62.2565 |
| 67  | Yes | 1127 | 59.1693 |

|     |     |      |         |
|-----|-----|------|---------|
| 60  | No  | 381  | 59.1082 |
| 70  | No  | 408  | 60.5904 |
| 114 | Yes | 520  | 61.9835 |
| 60  | Yes | 394  | 58.7953 |
| 117 | Yes | 961  | 63.4326 |
| 120 | Yes | 710  | 61.409  |
| 96  | Yes | 766  | 60.4659 |
| 135 | Yes | 937  | 62.1563 |
| 73  | Yes | 450  | 60.1867 |
| 104 | Yes | 534  | 61.6627 |
| 70  | Yes | 491  | 59.8841 |
| 64  | No  | 470  | 58.0997 |
| 67  | No  | 663  | 62.8204 |
| 62  | Yes | 339  | 60.3944 |
| 65  | No  | 716  | 59.924  |
| 136 | Yes | 522  | 61.8921 |
| 63  | No  | 499  | 59.7023 |
| 106 | Yes | 746  | 62.4057 |
| 148 | Yes | 484  | 61.5956 |
| 128 | Yes | 571  | 61.2711 |
| 129 | Yes | 831  | 62.8985 |
| 99  | Yes | 972  | 59.4075 |
| 61  | Yes | 453  | 58.1112 |
| 102 | Yes | 415  | 61.6694 |
| 61  | Yes | 547  | 58.9927 |
| 108 | Yes | 2644 | 61.3212 |
| 61  | No  | 675  | 59.4468 |
| 116 | Yes | 596  | 64.3851 |
| 63  | Yes | 512  | 59.9414 |
| 68  | Yes | 573  | 58.7386 |
| 72  | Yes | 326  | 61.3981 |
| 77  | Yes | 405  | 62.2755 |
| 60  | Yes | 533  | 60.0841 |

|     |     |      |         |
|-----|-----|------|---------|
| 132 | Yes | 394  | 62.7341 |
| 80  | Yes | 455  | 60.4269 |
| 77  | No  | 645  | 62.4784 |
| 62  | No  | 397  | 60.2998 |
| 75  | Yes | 902  | 59.9208 |
| 71  | No  | 605  | 62.0218 |
| 77  | Yes | 3170 | 59.2994 |
| 118 | Yes | 231  | 60.1738 |
| 144 | Yes | 1458 | 61.6902 |
| 126 | Yes | 655  | 61.2325 |
| 132 | Yes | 629  | 61.0219 |
| 106 | Yes | 736  | 61.5905 |
| 76  | No  | 566  | 62.0179 |
| 75  | Yes | 425  | 59.0941 |
